# Supplementary material for: Low-voltage pentacene transistor inverters using micro-contact printed nano-layer
Source: Royal Society of Chemistry journal article supplement (doi:10.1039/b922675c), 2009-12-04
Supplement: b922675c.pdf [file b922675c.pdf]

## Electronic Supplementary Information

### Low-voltage pentacene transistor inverters using micro-contact printed nano-layer

Kwang H. Lee, Min Suk Oh, Byoung H. Lee, Myung M. Sung and Seongil Im\*

We have evidences to show a good control level of the monolayer property as indicated in the inverter VTC curves of Fig. SI1 where the three inverters show a similar amount of shift (the inverter I1 is the device for Fig. 4(a)). This means that a fast micro-contacting nicely controls the VTC properties of inverters without much deviation. Being confident on these inverter results, we fabricated a ring oscillator composed of 3 serial sets of similar property inverters (I1, I2 and I3) as shown in Fig. SI2(a). The 3 load-TFTs are  $\mu$ CP-treated. One set of load- and driver-TFTs is an inverter. If our  $\mu$ CP-treatment is not secured or unstable, the VTC curves that show similar inverter properties must not be achieved.

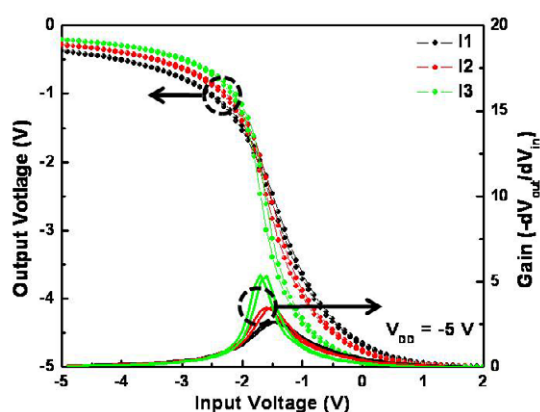

Fig. SI1. The VTC and voltage gain of similar property inverters in a ring oscillator (3 serial sets).

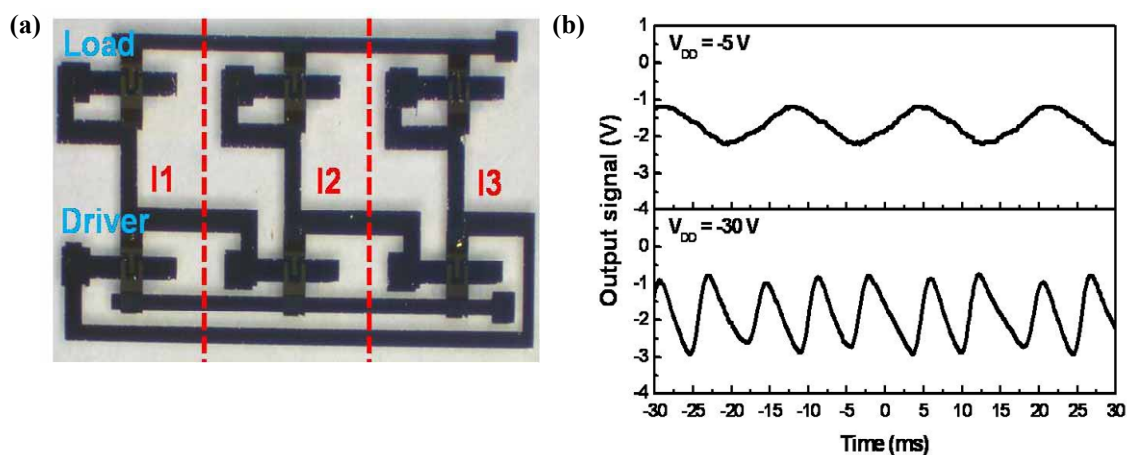

Fig. SI2. (a) The photograph and (b) oscillating actions of 3 stage ring oscillator.
